# Supplementary material
Source: publisher figshare collection journal article supplement (https://gsajournals.figshare.com/ndownloader/files/28401855)
Supplement: Supplementary file 1 [file 28401855]

Table S1. Raw Sequencing Data

| **Library type** | **Reads Length** | **Insert Size** | **Number of libraries** | **Genomic Coverage** |
| --- | --- | --- | --- | --- |
| **PCR-free** | 2x260bp | 470 | 2 | X133 |
| **PCR-free** | 2x160bp | 800 | 2 | X36 |
| **Mate-Pair** | 2x160bp | 3000 | 2 | X67 |
| **Mate-Pair** | 2x160bp | 6000 | 2 | X58 |
| **Mate-Pair** | 2x160bp | 9000 | 2 | X57 |
